# Supplementary material
Source: PubMed Central journal article supplement (PMC8384654)
Supplement: NIHMS1685830-supplement-1.pdf [file NIHMS1685830-supplement-1.pdf]

## **SUPPLEMENTAL METHODS**

### **Experimental Model and Subject Details**

#### *Patients*

All patients and healthy controls were recruited from the Department of Dermatology at the University of Pennsylvania Hospital with appropriate Institutional Review Board approval. All subjects signed informed consent before participating in this study.

Patients were diagnosed with DM using Bohan and Peter criteria, Sontheimer criteria, or investigator expert experience and subsequently placed in a longitudinal DM database. Lesional skin biopsies were obtained from 10 patients with newly diagnosed moderate-severe DM and 5 healthy controls. The CDASI score was determined for each DM patient at time of skin biopsy. DM patients were also given the Skindex-29; this study used question 10 from the Skindex to quantify patient reported itch on a scale of 1 (never) to 5 (all the time).

### **Methods Details**

#### *Immunofluorescence staining*

Formalin-fixed and paraffin embedded (FFPE) 4-mm skin biopsies were cut into 5- $\mu$ m sections and placed onto glass slides. Slides were dewaxed at 60°C overnight and rehydrated subsequently by washing in Citrisolv® (Fisher Scientific), 100%-50% ethanol, and deionized (DI) water. Heat induced antigen retrieval was performed in EDTA at 95°C. Sections were blocked at room temperature (RT) for 2 hours with 3% BSA. Tissues were thereafter incubated in primary antibodies overnight at 4°C. After washing with PBST, secondary antibody incubation was done at RT for 1 hour with appropriate goat anti mouse/rabbit antibodies conjugated to Alexa

Fluor 488/594 (ThermoFisher). Tissues were washed with PBST and treated with TrueView (Vector Laboratories) for 2 minutes after which they were washed and mounted with Vector antifade mounting medium with DAPI.

### ***RNA ISH***

In situ detection of ITGAX, IFN $\beta$ , CLEC4C, IL4, IL31, and IFN $\gamma$  mRNA transcripts was done using the RNAscope kit and probes (Acad Bio). Fluorescent signal amplification was used using Opal based dyes conjugated to HRP (Akoya Biosciences). Positive staining was determined to be fluorescent dots expressed higher than the negative control DapB gene from *Bacillus subtilis* bacterium. Slides were counterstained using DAPI and imaged using a Nikon Eclipse Ti.

### ***IMC***

#### Antibody Staining and Image acquisition

Prior to processing of tissue, antibodies were conjugated to different metal isotopes using the Maxpar Antibody Labeling Kit (Fluidigm). FFPE 5- $\mu$ m sections were deparaffinized, washed, antigen retrieved, and blocked as above. Tissue sections were incubated in a cocktail of 37 metal conjugated antibodies in PBS with 1% BSA overnight at 4°C with respective dilutions seen in Table S1. The next day, slides were washed in PBST and incubated with a 1:400 dilution of Intercalator- Ir (Fluidigm) for 30 minutes at RT. Slides were washed 2 times in DI water for 2 minutes each and air dried for 30 minutes afterwards. Once dried the slides were processed with the Hyperion Imaging System (Fluidigm). Regions of interest (ROI) up to 2mm x 1mm were ablated at a frequency of 200Hz.

## Image processing and data analysis

The resulting MCD image files were exported to 32-bit TIFF files using MCD Viewer™ (Fluidigm). Cell segmentation was performed using a nuclear app-based algorithm in Visiopharm. The output segmentation was exported from Visiopharm and into a Cellprofiler app to create a cell mask as seen in Figure S5. The resulting mask and image TIFF files were then imported into histoCAT where per object mean pixel intensity (MPI) data was generated. The Phenograph algorithm was used for unsupervised clustering of cell populations using markers that had the best signal to noise ratio: pSTING, CD14, CD16, CD31, FOXP3, CD4, CD68, CD8, CD45RA, CD3, tryptase, CD11C, HLA-DR, MAC387, and CD163 with a second round of clustering to resolve under clustered clusters with merging phenotypes. CD20+ B cells were manually gated in FlowJo. Further subset gating for T cells was also done using CD69 and CD45RA using gate boundaries based on the corresponding image pixel values for the respective channels. Similarly, IL4 and IL31 positive mDC populations were gated in FlowJo (Figure S4). MPI for different cell populations and related heatmaps were gathered using histoCAT. Colocalization images were created using ImageJ and sliding scale pixel threshold values based corresponding marker signal/noise ratio.

### ***Quantification and Statistical Analysis***

Statistical analysis was done using GraphPad Prism v8.3. Due to small sample size and lack of normal distribution we used non-parametric tests and reported all data as median, except for average percent composition of cell populations in Figure 2b and Figure 4a. We used the Spearman rank correlation test to correlate CDASI and Skindex scores with cell counts and

pathways. The Mann-Whitney test was used to compare the HC group with DM group with  $p < 0.05$  being significant.

## SUPPLEMENTAL TABLES

Table S1: IMC Staining Panel

| Antibody | CLONE      | Channel | Dilution | CAT NO                    |
|----------|------------|---------|----------|---------------------------|
| CD20     | H1         | 115In   | 200      | 555677 (BD)               |
| pPPARY   | polyclonal | 141Pr   | 60       | 600-401-J94 (Rockland)    |
| pSTING   | D8K6H      | 142Nd   | 30       | 40818S (CST)              |
| CD14     | EPR3653    | 144Nd   | 200      | 3144025D                  |
| IL31RA   | 3A10       | 145Nd   | 100      | H00133396-M01 (Novus)     |
| CD16     | EPR16784   | 146Nd   | 50       | 3146020D (Fluidigm)       |
| CB2      | polyclonal | 147Sm   | 50       | LS-A34-50 (LsBio)         |
| IL31     | polyclonal | 150Nd   | 30       | ab102750 (abcam)          |
| CD31     | EPR3094    | 151Eu   | 200      | 3151025D (Fluidigm)       |
| IFNB     | polyclonal | 153Eu   | 75       | NBP1-77288 (Novus)        |
| CD45     | 2B11       | 154Sm   | 100      | 14-9457-82 (ThermoFisher) |
| FOXP3    | 236A/E7    | 155Gd   | 100      | 3155016D (Fluidigm)       |
| CD4      | EPRG855    | 156Gd   | 100      | 3156033D (Fluidigm)       |
| CCR7     | Y59        | 158Gd   | 500      | ab221209 (abcam)          |
| CD68     | KP1        | 159Tb   | 150      | 3159035D (Fluidigm)       |
| CD69     | EPR21811   | 160Gd   | 50       | ab234512 (abcam)          |
| BDCA2    | 992258     | 161Dy   | 30       | MAB62991-100 (RD)         |
| CD8      | C8/144B    | 162Dy   | 200      | 3162034D (Fluidigm)       |

|          |            |       |       |                          |
|----------|------------|-------|-------|--------------------------|
| pIRF3    | polyclonal | 163Dy | 30    | PA5-38285 (ThermoFisher) |
| CD56     | 301021     | 164Dy | 125   | 14255-1-AP (Proteintech) |
| pTBK1    | 53103      | 165Ho | 2000  | ab109272 (abcam)         |
| CD45RA   | HI100      | 166Er | 400   | 3166028D (Fluidigm)      |
| IFNY     | IFNG/466   | 167Er | 50    | ab218890 (abcam)         |
| IL4      | polyclonal | 168Er | 50    | ab9622 (abcam)           |
| IL17     | polyclonal | 169Tm | 50    | ab79056 (abcam)          |
| CD3      | polyclonal | 170Er | 100   | 3170019D (Fluidigm)      |
| pERK     | D13.14.4E  | 171Yb | 50    | 3171021D (Fluidigm)      |
| Tryptase | AA11       | 172Yb | 20000 | ab2378 (abcam)           |
| CD11C    | EP1347Y    | 173Yb | 150   | ab216655 (abcam)         |
| HLA-DR   | TAL 1B5    | 174Yb | 400   | ab20181 (abcam)          |
| MAC387   | MAC387     | 175Lu | 800   | ab22506 (abcam)          |
| CD163    | 5C6-FAT    | 176Yb | 100   | MCA1853 (BioRad)         |

Table S2: Demographics of healthy controls and dermatomyositis patients

|                      | HC              | DM              |
|----------------------|-----------------|-----------------|
| Female n (%)         | 5 (100)         | 9 (90)          |
| Age (y) Mean<br>± SD | 53.8 ± 6.7      | 56.7 ± 4.5      |
| Race (%)             | Caucasian (100) | Caucasian (100) |

Table S3: Dermatomyositis patient characteristics

| Study ID | Age | Sex    | Race      | Site     | CDASI | Skindex-29 Itch |
|----------|-----|--------|-----------|----------|-------|-----------------|
| 1        | 74  | Male   | Caucasian | back     | 44    | 4               |
| 2        | 67  | Female | Caucasian | arm      | 36    | 4               |
| 3        | 61  | Female | Caucasian | back     | 30    | 5               |
| 4        | 34  | Female | Caucasian | thigh    | 24    | 4               |
| 5        | 52  | Female | Caucasian | shoulder | 28    | 4               |
| 6        | 54  | Female | Caucasian | back     | 25    | 2               |
| 7        | 62  | Female | Caucasian | back     | 17    | 3               |
| 8        | 69  | Female | Caucasian | chest    | 33    | 5               |
| 9        | 32  | Female | Caucasian | chest    | 21    | 5               |
| 10       | 62  | Female | Caucasian | arm      | 27    | 3               |

CDASI: Cutaneous dermatomyositis disease area and severity index

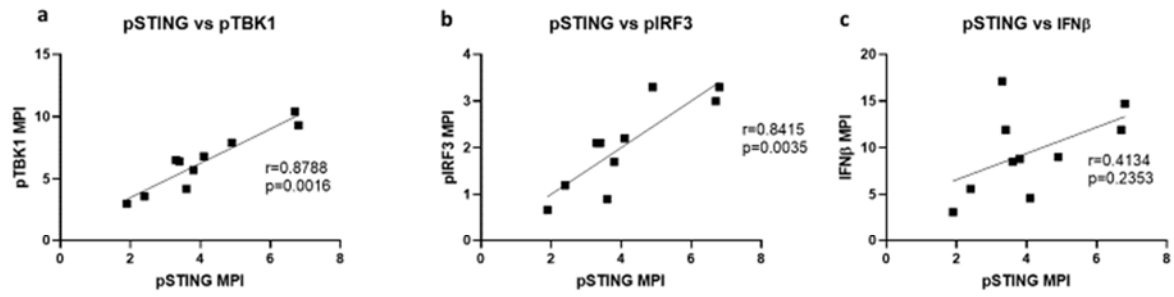

Figure S1: pSTING and downstream Type I IFN pathway correlations

- a) Positive MPI per cell correlation of pSTING pathway with pTBK1
- b) Positive MPI per cell correlation of pSTING pathway with pIRF3
- c) No significant MPI per cell correlation of pSTING pathway with IFN $\beta$

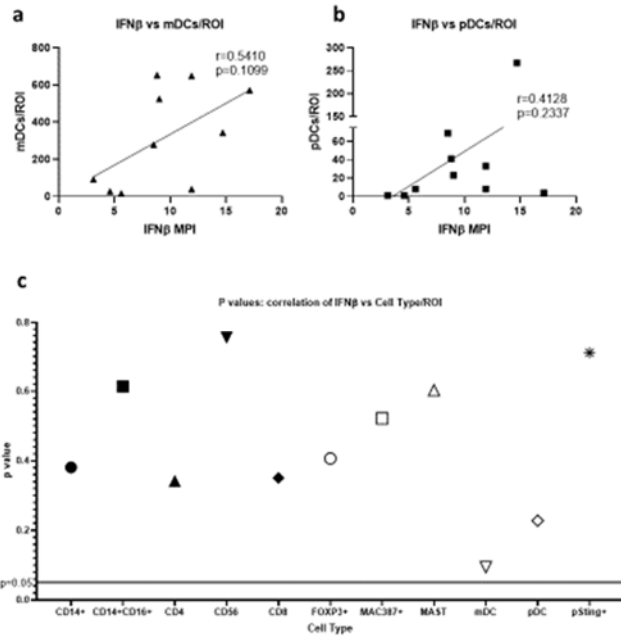

Figure S2: Correlation of the numbers of immune cells with IFN $\beta$

- a. Correlation of IFN $\beta$  with mDCs per ROI
- b. Correlation of IFN $\beta$  with pDCs per ROI
- c. P values for correlation of immune cells identified with IFN $\beta$  shows trend for mDCs correlating the most with overall IFN $\beta$  MPI per cell



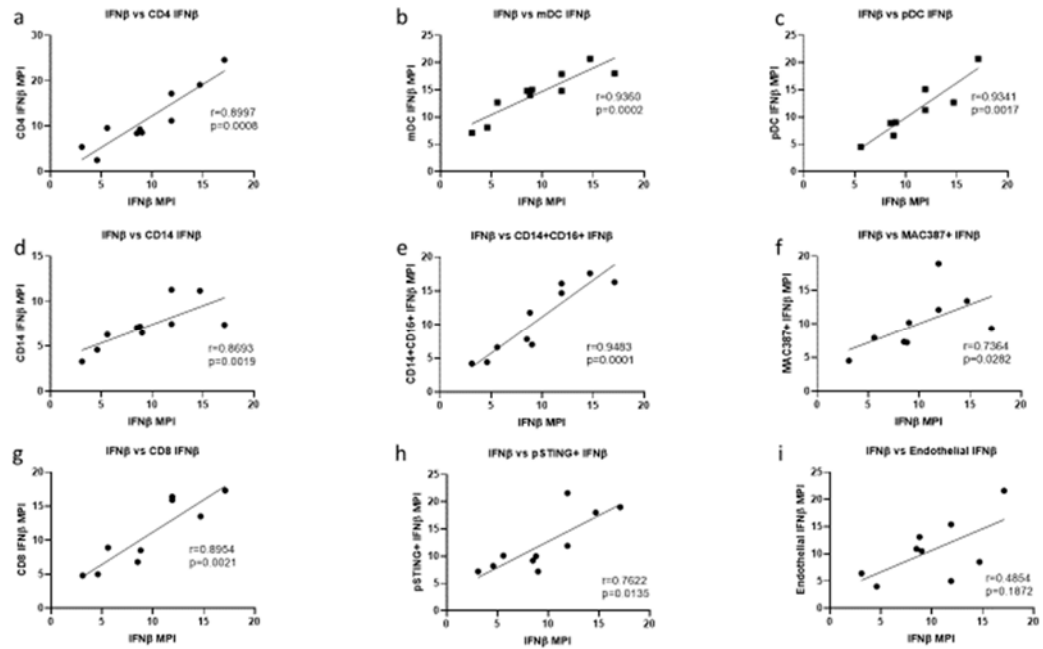

Figure S3: Overall skin IFN $\beta$  correlation with cellular IFN $\beta$

a-h) Correlation of the overall MPI IFN $\beta$  with individual cellular IFN $\beta$  shows significant correlations for (a) CD4+ T, (b) mDCs, (c) pDCs, (d) CD14+ macrophages, (e) CD14+CD16+ macrophages, (f) MAC387+ macrophages, (i) CD8+ T cells, and (h) pSTING+ macrophages.

(i) There is no significant correlation of IFN $\beta$  with endothelial IFN $\beta$ .

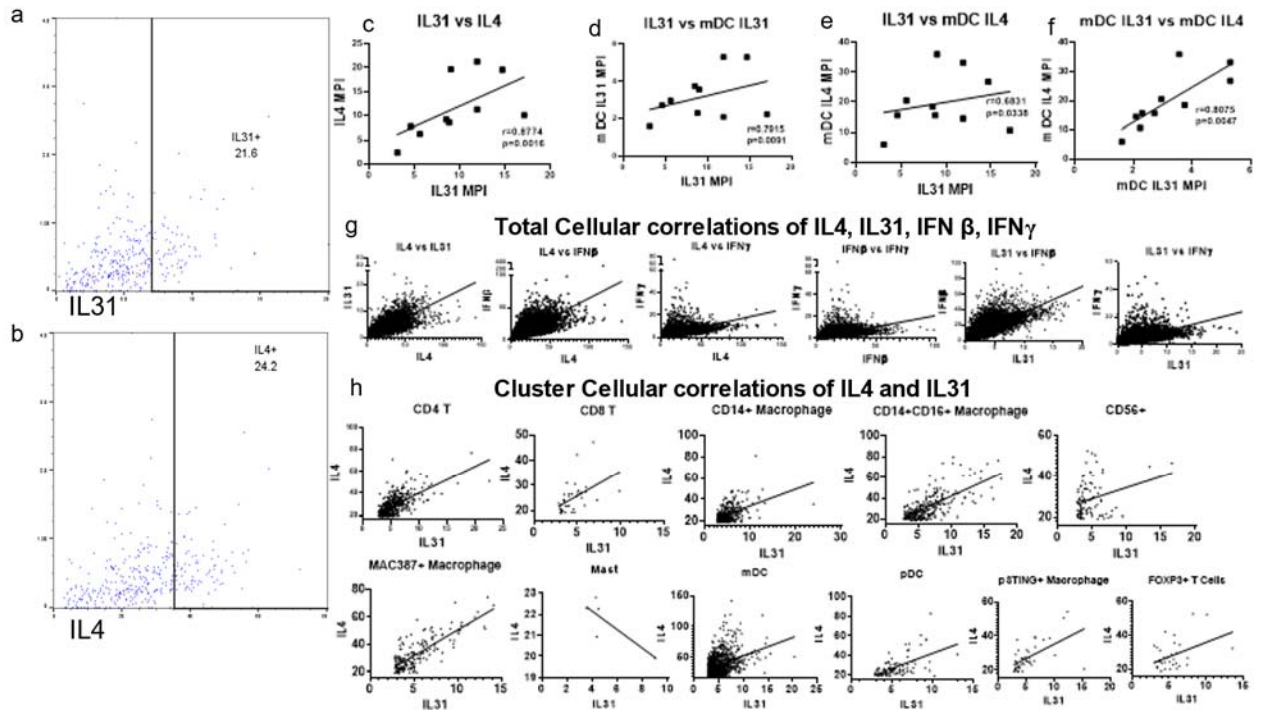

Figure S4: Gating of IL31<sup>+</sup> and IL4<sup>+</sup> mDCs and Correlation of IL4 and IL31 expression

- FlowJo Gating of IL31<sup>+</sup> mDCs
- FlowJo Gating of IL4<sup>+</sup> mDCs
- Positive Correlation of overall IL31 and IL4 MPI
- Positive correlation of overall IL31 with mDC IL31
- Positive correlation of overall IL31 with mDC IL4;
- Positive correlation of mDC IL31 with mDC IL4.
- Total cellular correlation of IL4, IL31, IFN $\beta$ , and IFN $\gamma$
- Cluster Cellular correlations of IL4 and IL31

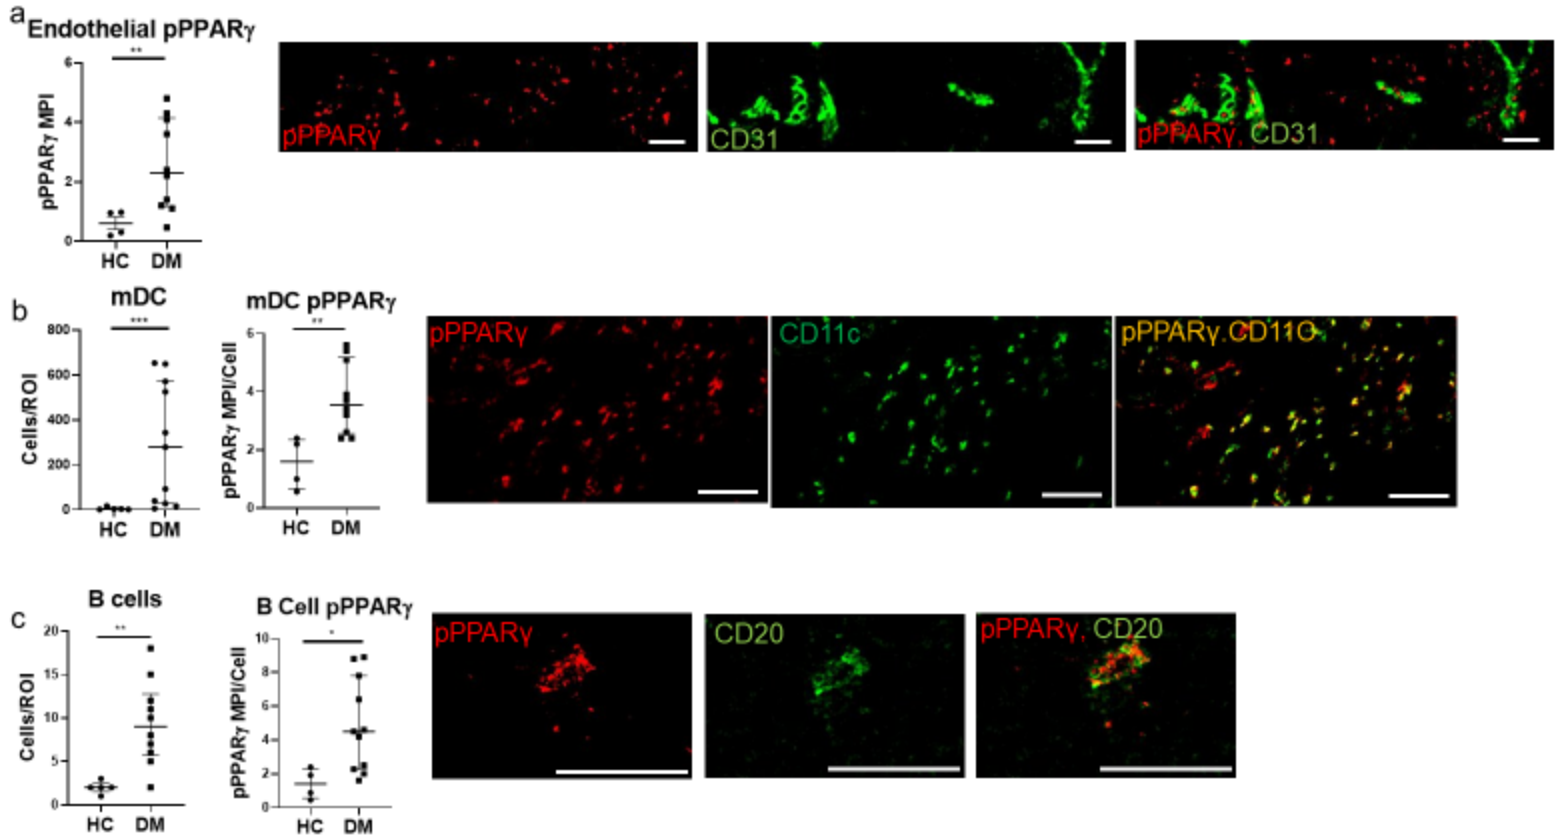

Figure S5. The Endothelium, mDCs, and B cells express increased pPPAR $\gamma$  in DM

a) Endothelial cells in DM skin lesions have increased pPPAR $\gamma$  compared to the endothelial cells in HC skin. The pPPAR $\gamma$  pathway (red) is upregulated in CD31<sup>+</sup> endothelial cells (green), IMC shows colocalization of nuclear pPPAR $\gamma$  in endothelial cells. b) DM skin has increased mDCs compared to HC skin mDCs and they express higher levels of pPPAR $\gamma$ . IMC shows colocalization of pPPAR $\gamma$  (red) and CD11c (green) as yellow regions. c) Increased B cells in DM skin compared to HC skin also express increased pPPAR $\gamma$ . The pPPAR $\gamma$  pathway (red) is shown to overlap with B cells (green) as seen by yellow regions and intracellular location of pPPAR $\gamma$ . Scale bars = 100  $\mu$ m (white). \*  $p < 0.05$ , \*\*  $p < 0.01$ , \*\*\*  $p < 0.001$

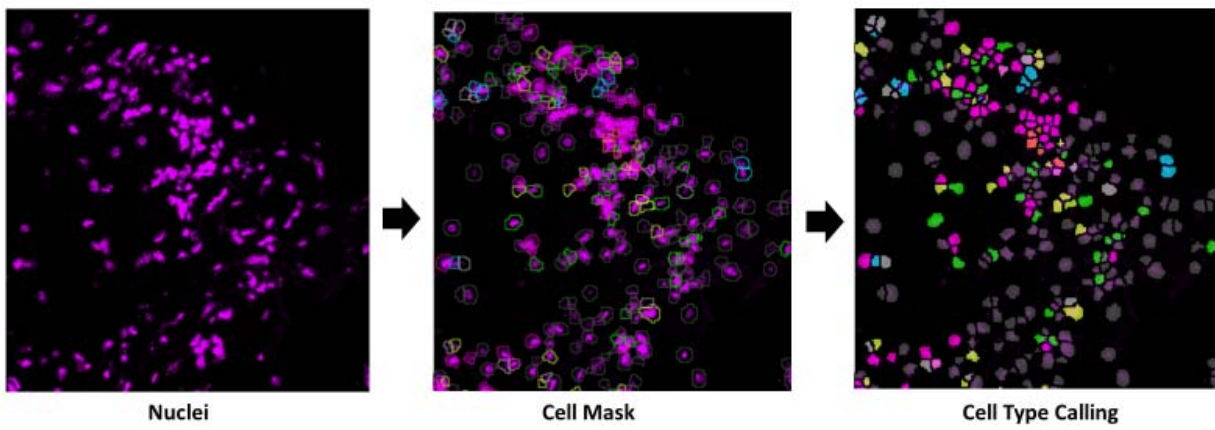

Figure S6: Nuclei based Image segmentation and cell mask creation. Segmentation of cells was performed using nuclei to create a cell mask outline which was subsequently used to identify individual cell expression profiles and cluster populations.

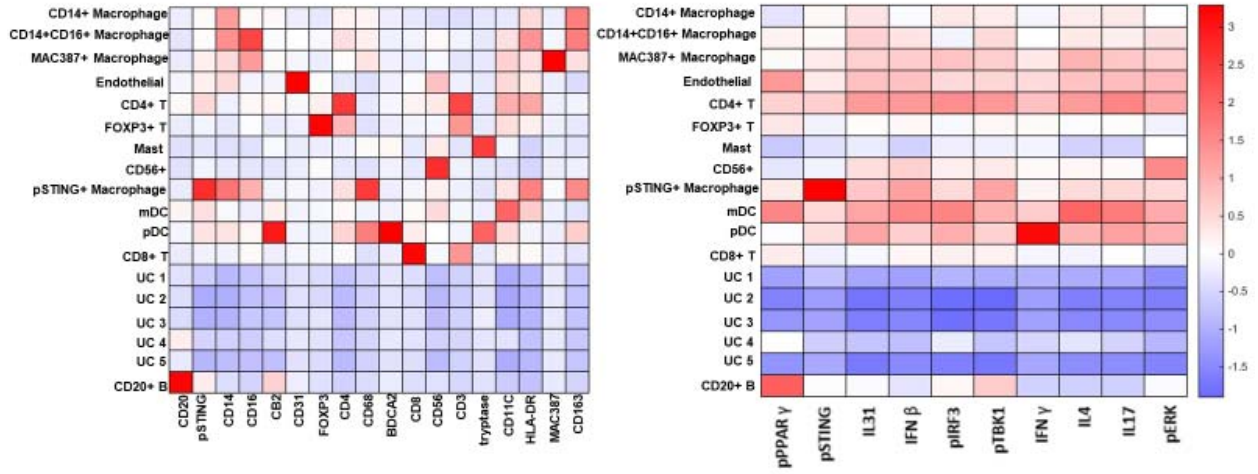

Figure S7: Heatmap of cellular and pathway markers including unidentified clusters (UC) 1-5 displaying little expression of antibodies.
